# Supplementary material
Source: ML conference proceedings conference paper supplement (https://openreview.net/forum?id=NA2vUMaMOm)

consistency for COVERTYPE, k=20

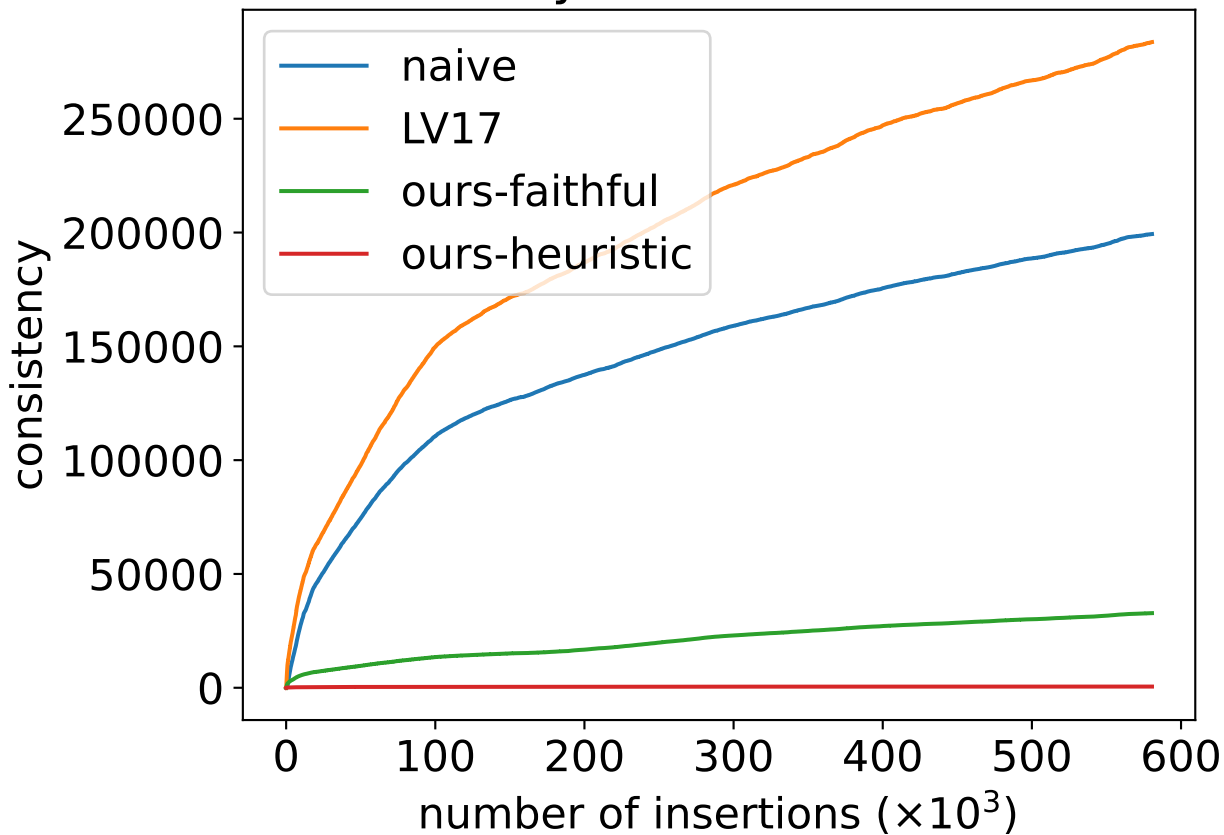

Supplement: supplementary_material [file attachment]

cumulative running time for SHUTTLE,  $k=10$

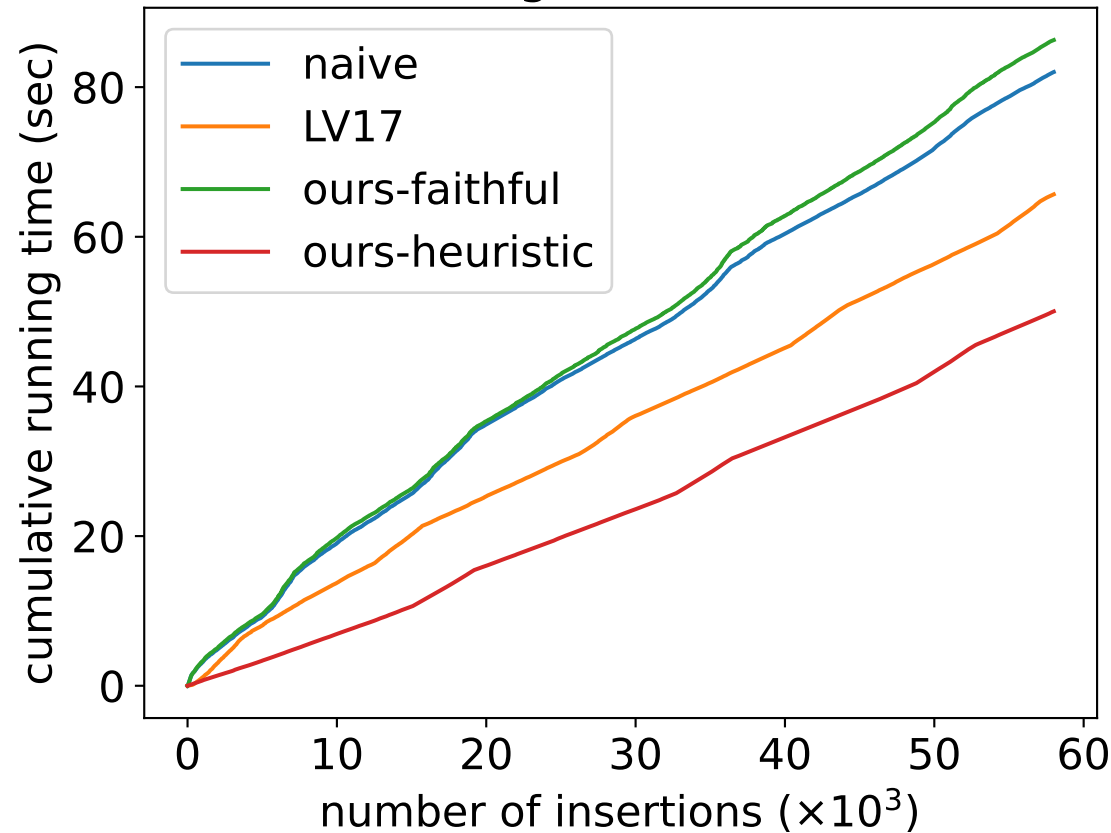

Supplement: supplementary_material [file attachment]

cumulative running time for SKIN,  $k=5$

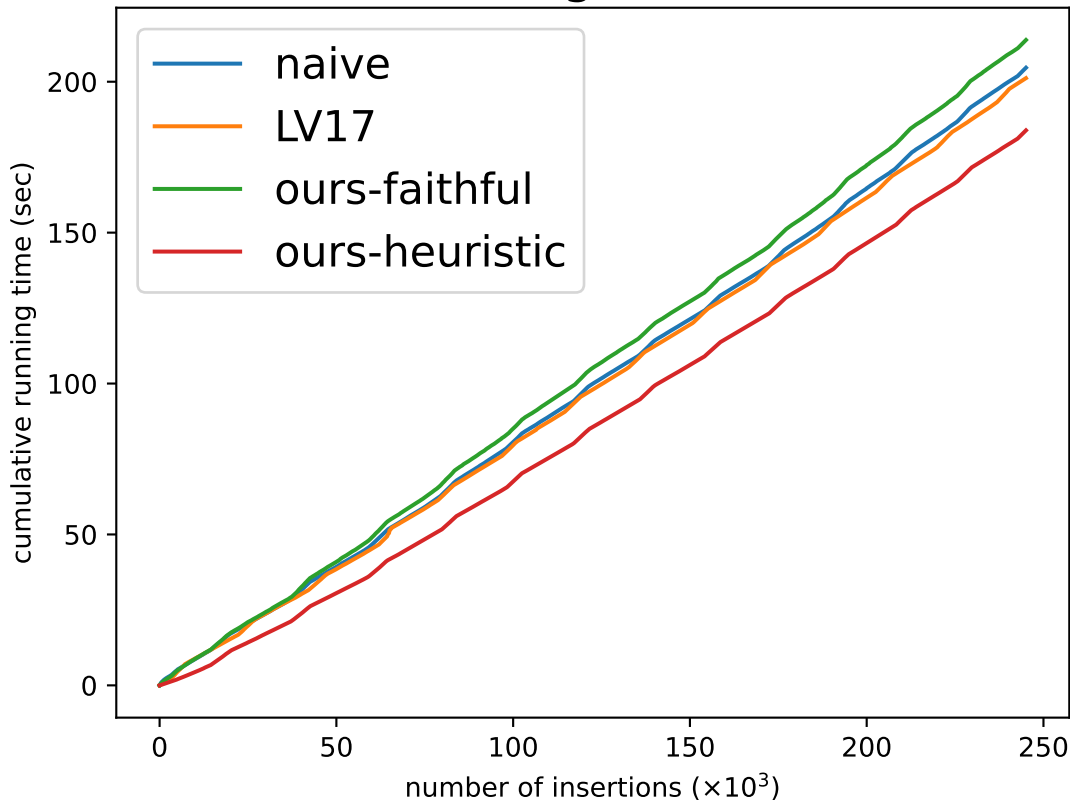

Supplement: supplementary_material [file attachment]

cumulative running time for COVERTYPE,  $k=5$

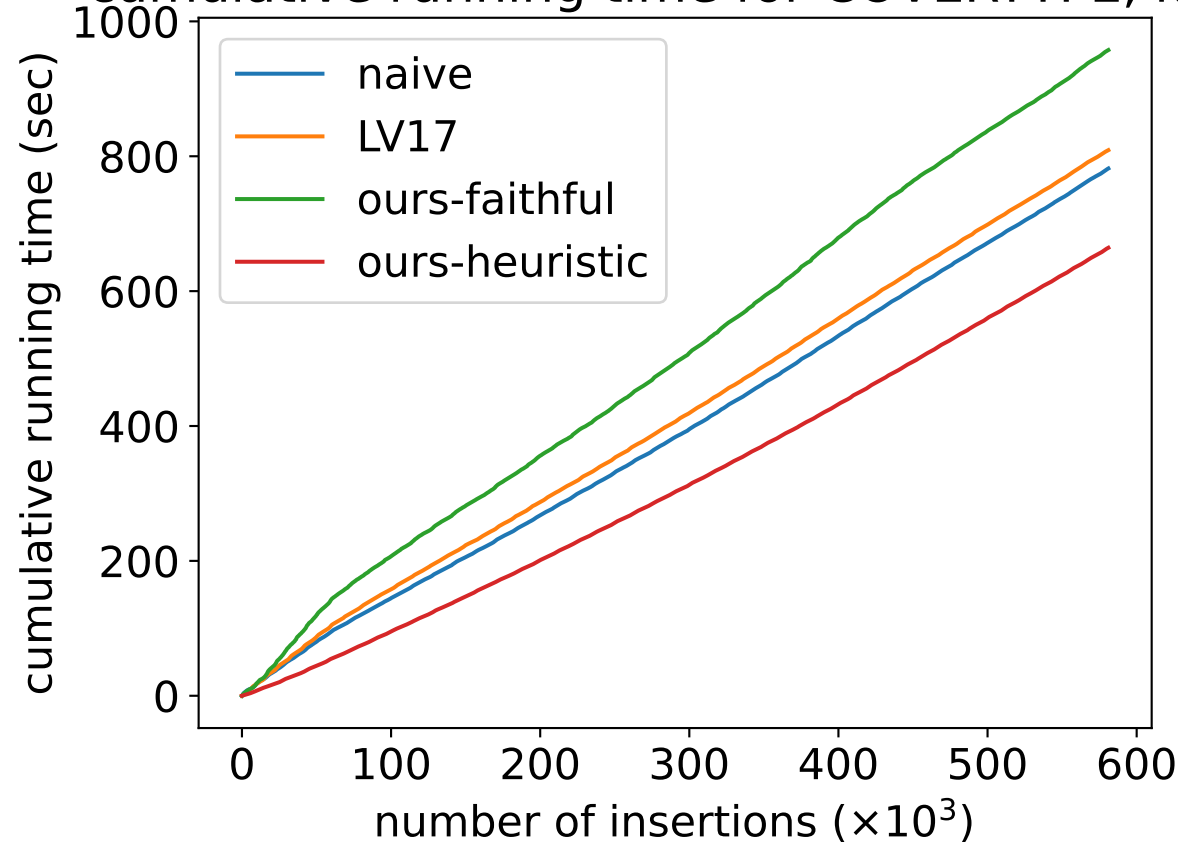

Supplement: supplementary_material [file attachment]

consistency for SKIN, k=10

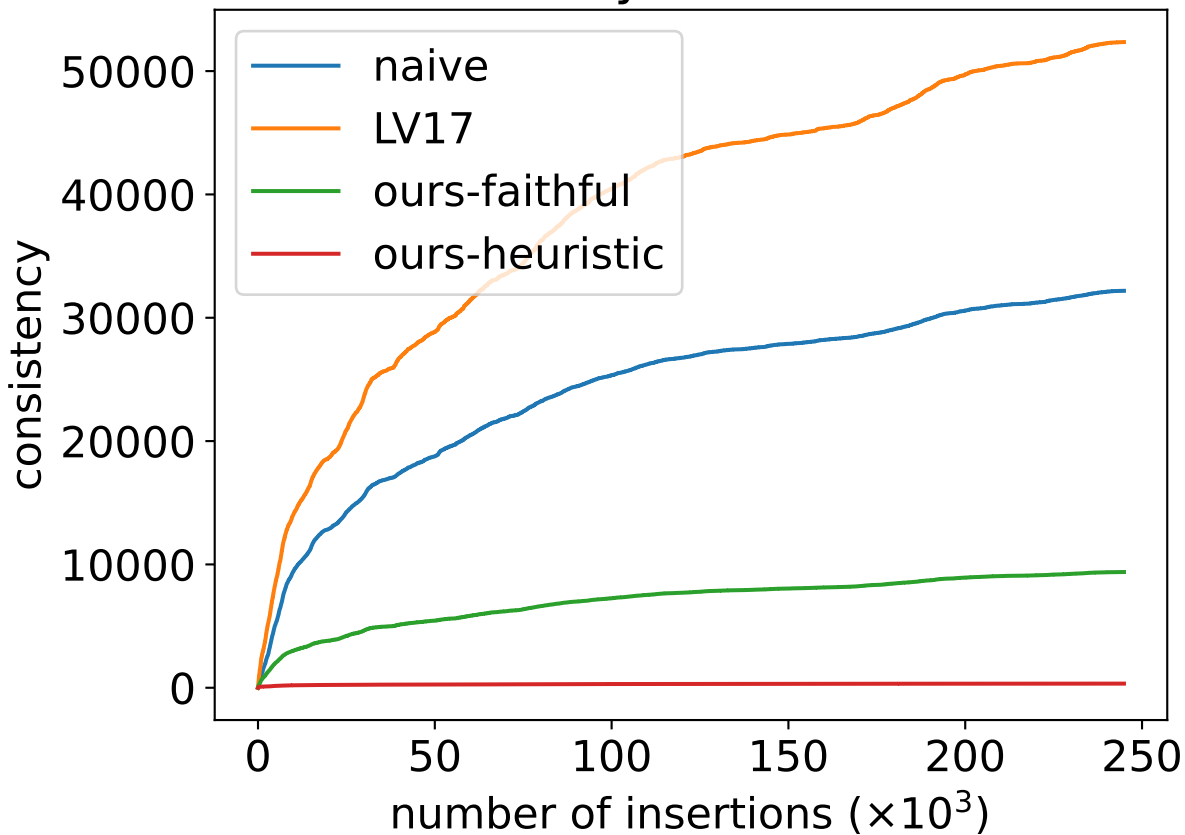

Supplement: supplementary_material [file attachment]

cost for shuttle, k=5

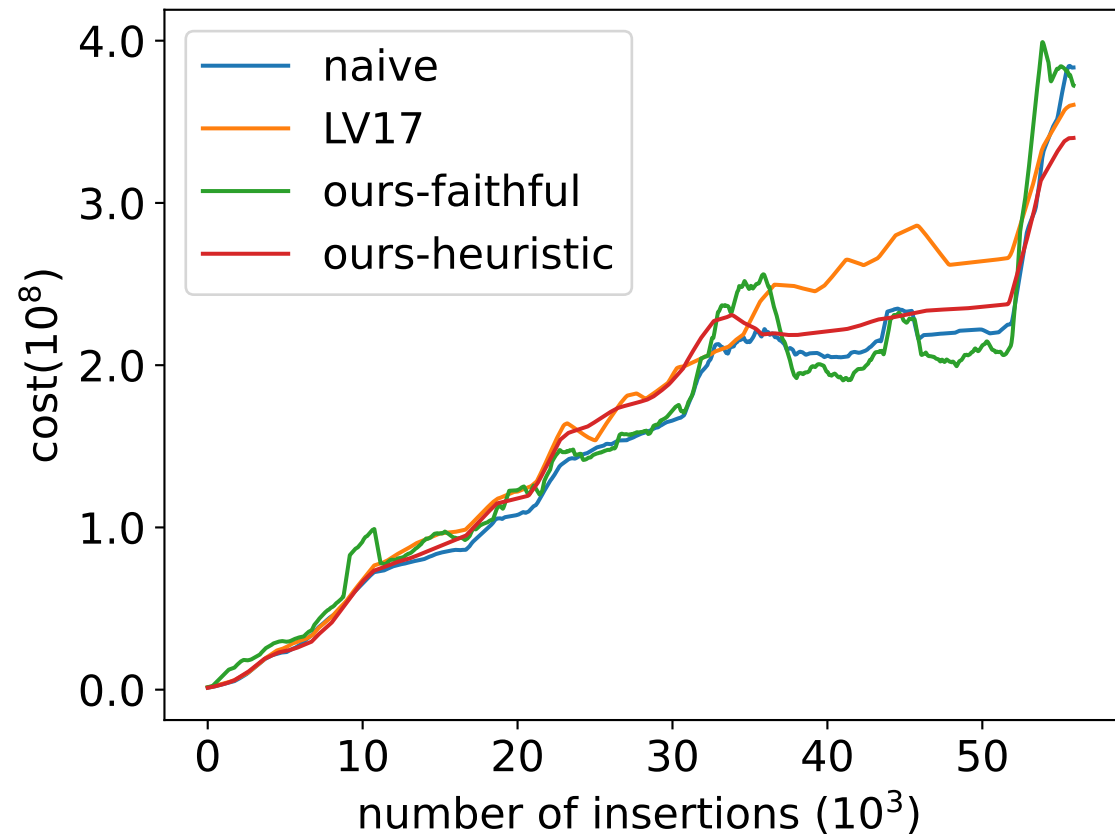

Supplement: supplementary_material [file attachment]

consistency for SHUTTLE, k=10

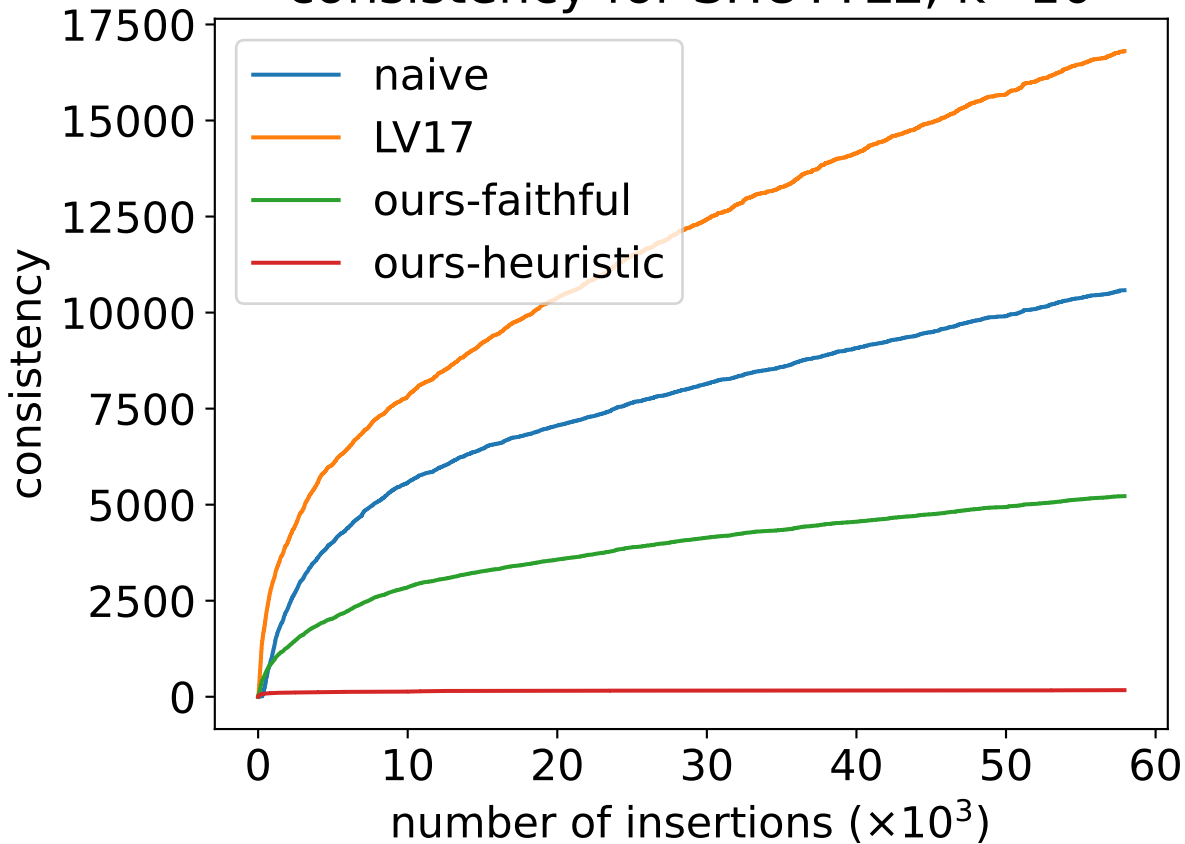

Supplement: supplementary_material [file attachment]

cumulative running time for SHUTTLE,  $k=20$

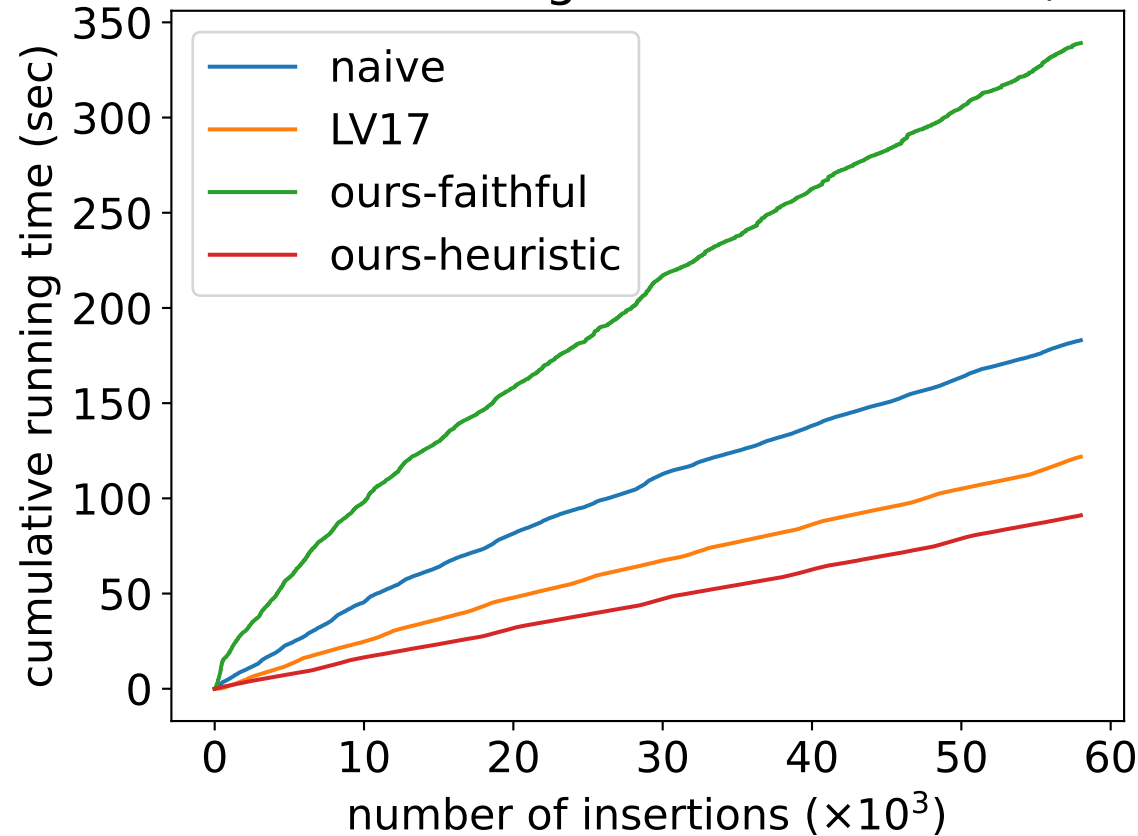

Supplement: supplementary_material [file attachment]

cost for shuttle, k=10

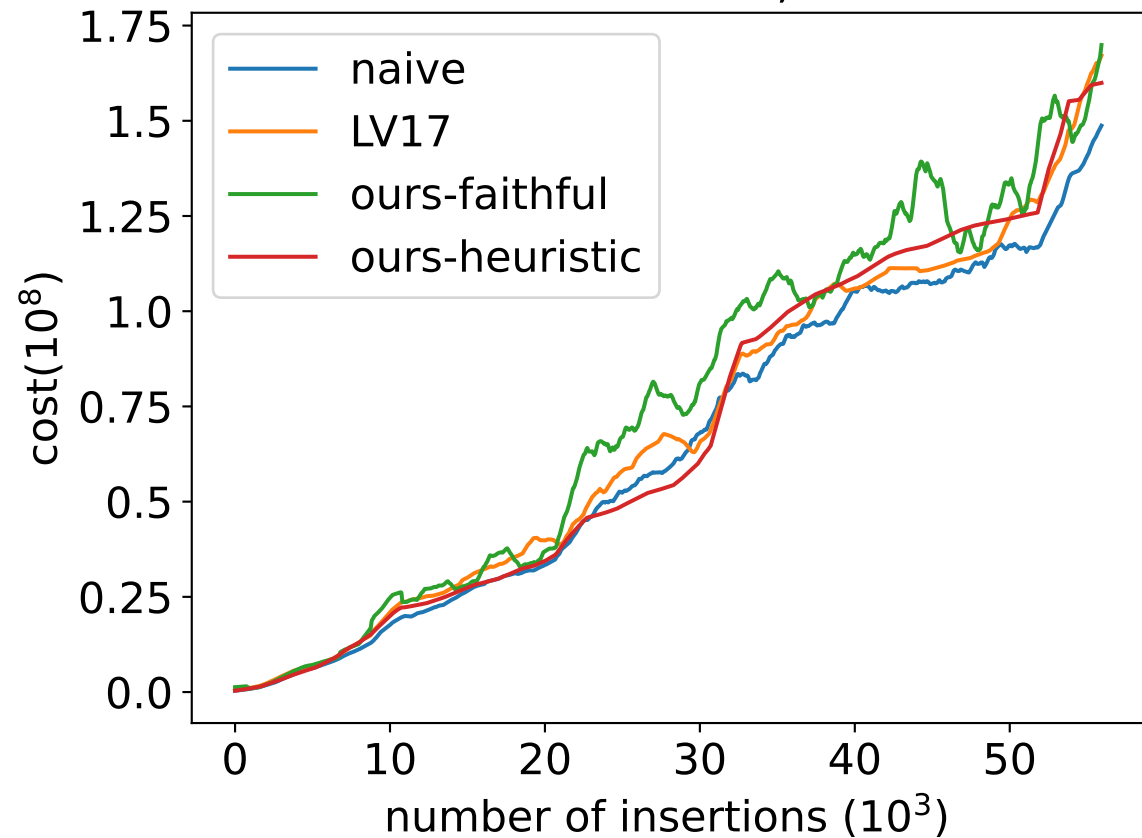

Supplement: supplementary_material [file attachment]

cost for covertime, k=20

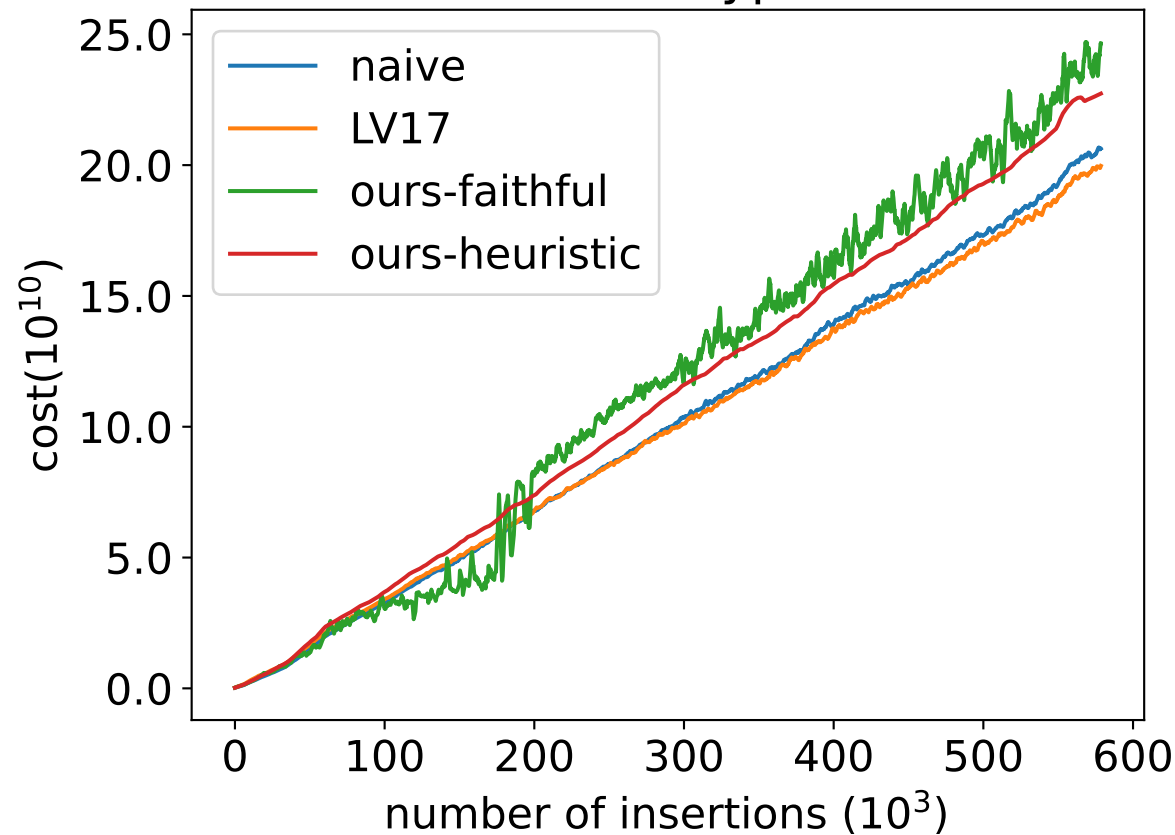

Supplement: supplementary_material [file attachment]

consistency for SHUTTLE, k=5

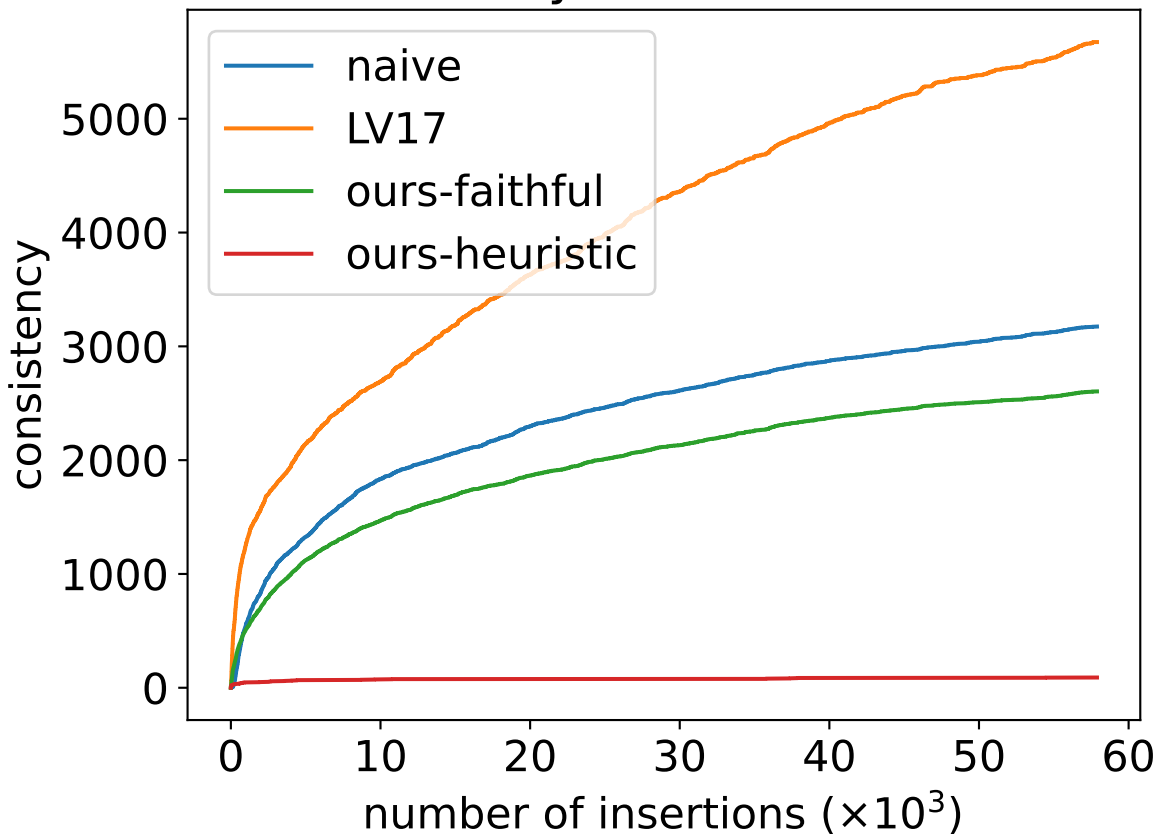

Supplement: supplementary_material [file attachment]

cost for skin, k=5

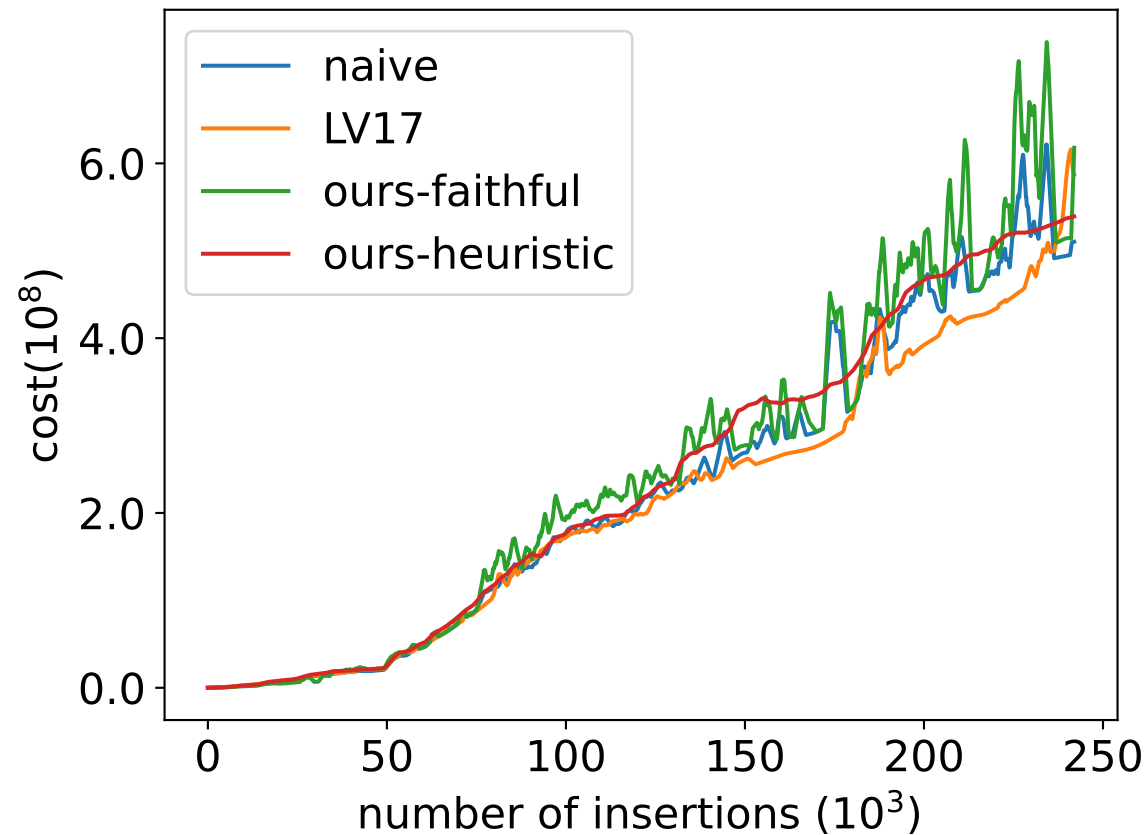

Supplement: supplementary_material [file attachment]

cost for skin, k=20

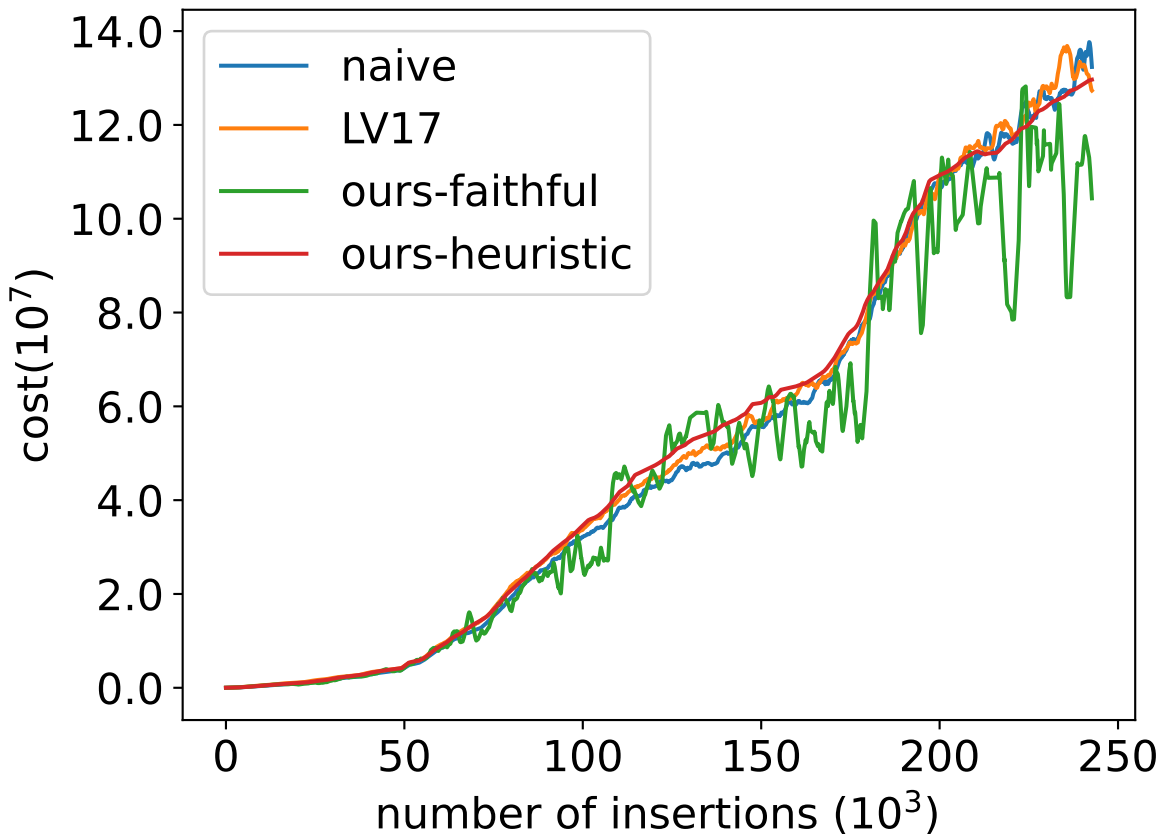

Supplement: supplementary_material [file attachment]

cumulative running time for COVERTYPE, k=20

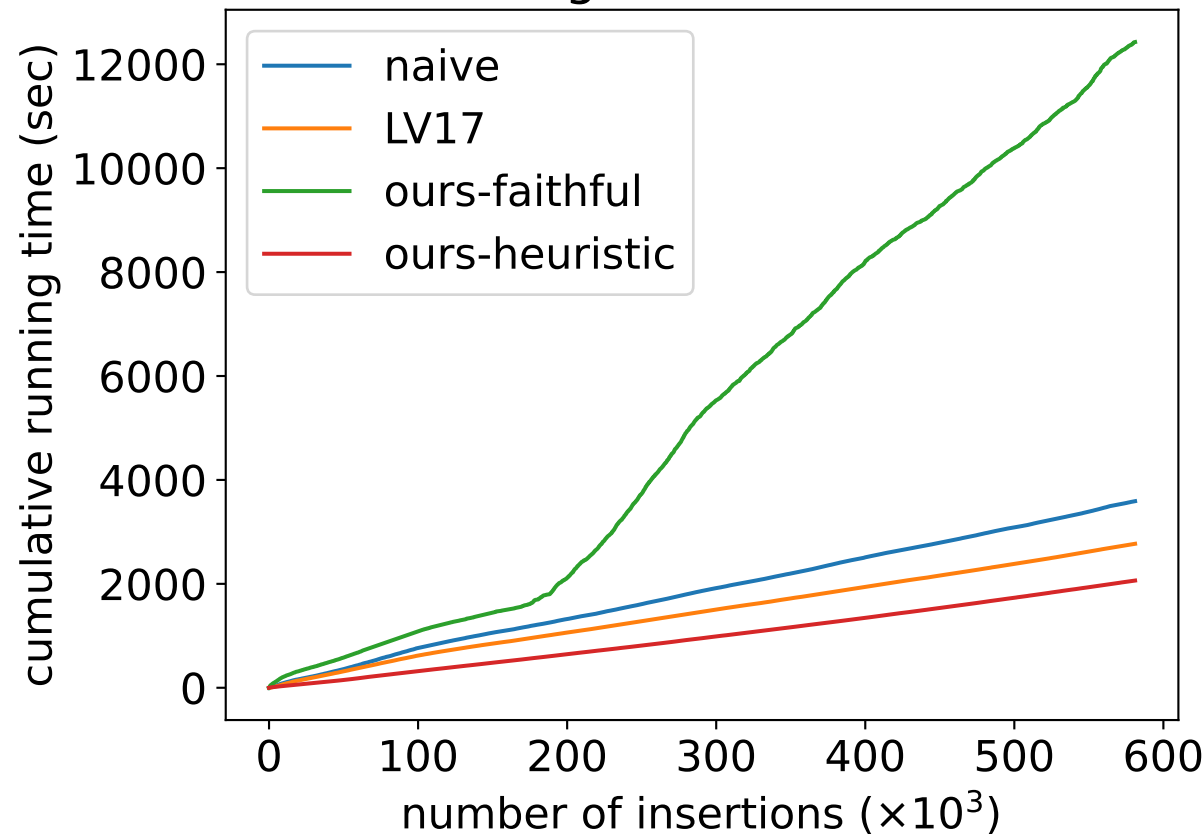

Supplement: supplementary_material [file attachment]

consistency for COVERTYPE, k=10

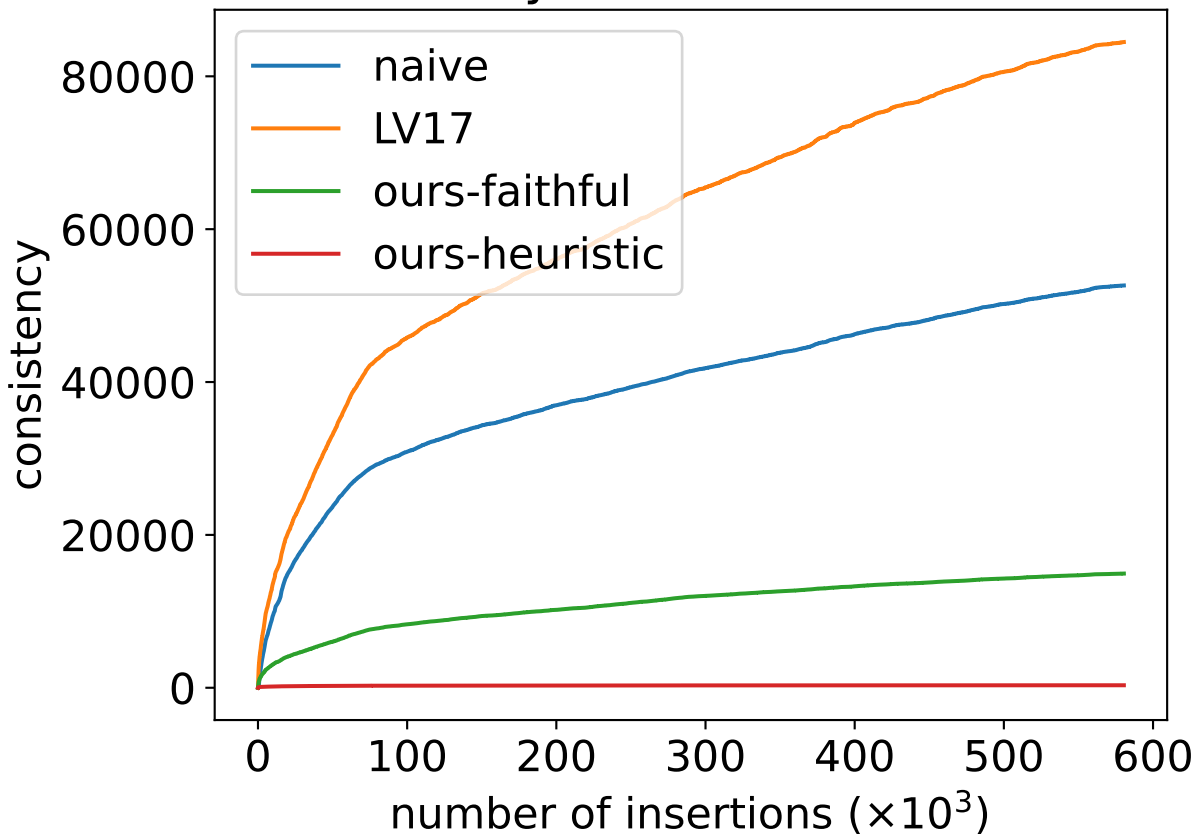

Supplement: supplementary_material [file attachment]

consistency for SHUTTLE, k=20

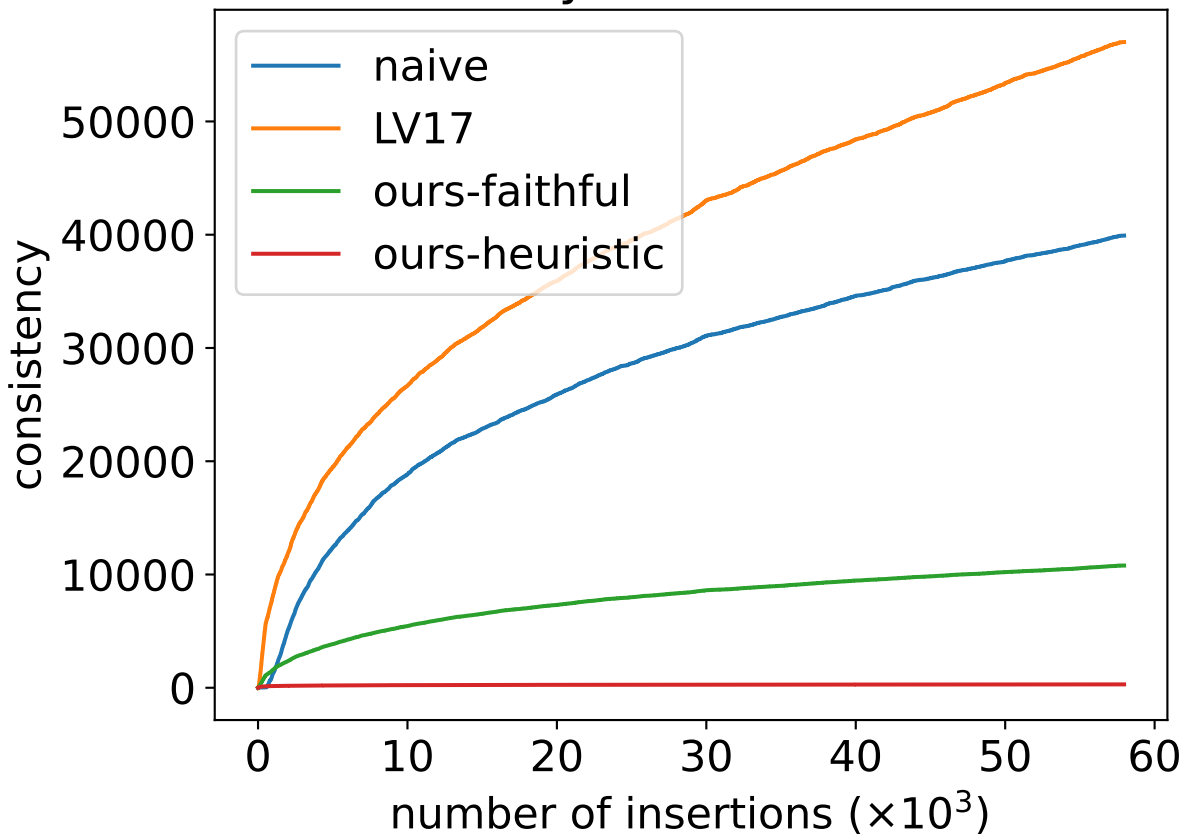

Supplement: supplementary_material [file attachment]

cost for covertime, k=10

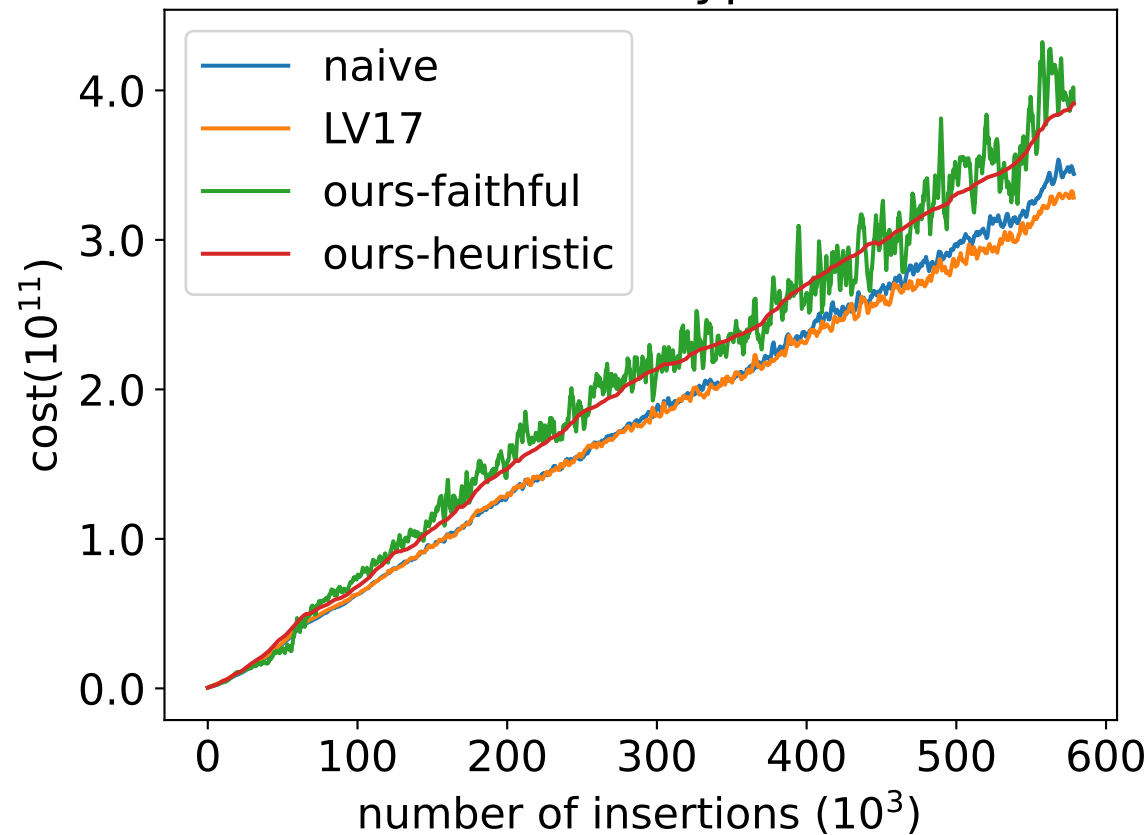

Supplement: supplementary_material [file attachment]

cumulative running time for SKIN, k=20

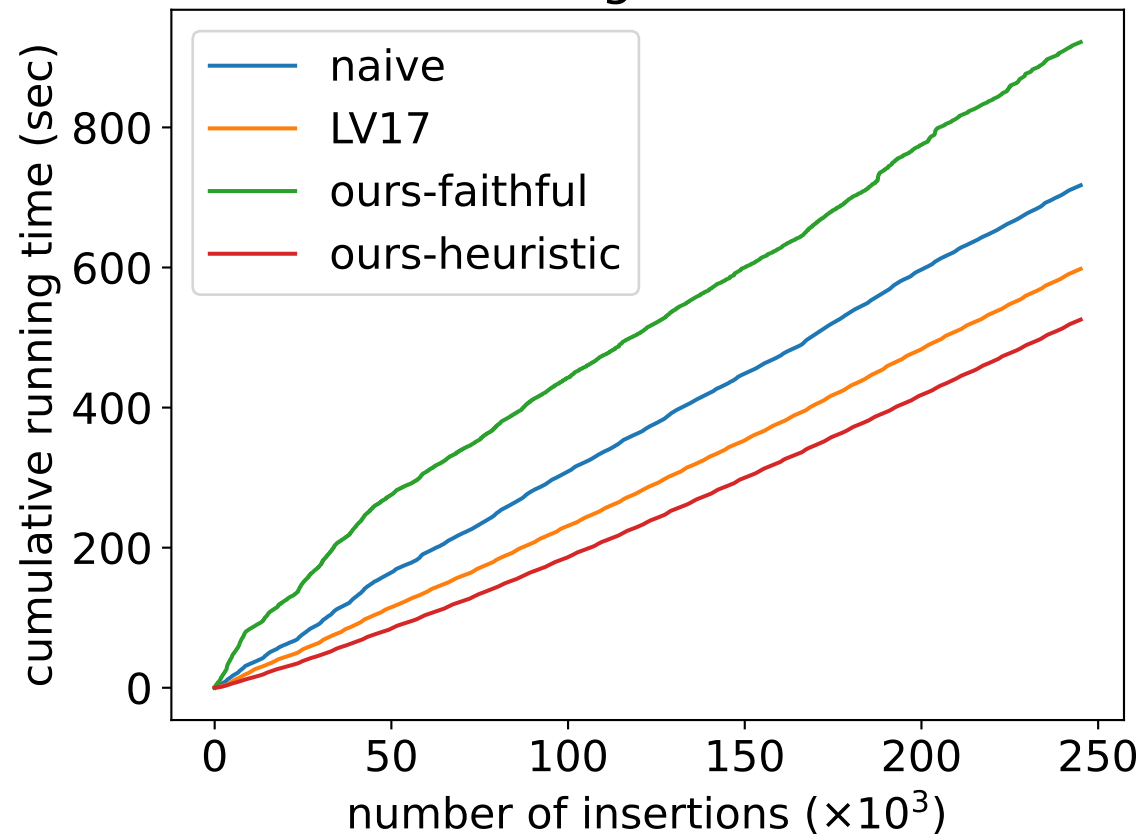

Supplement: supplementary_material [file attachment]

cost for covertypes,  $k=5$

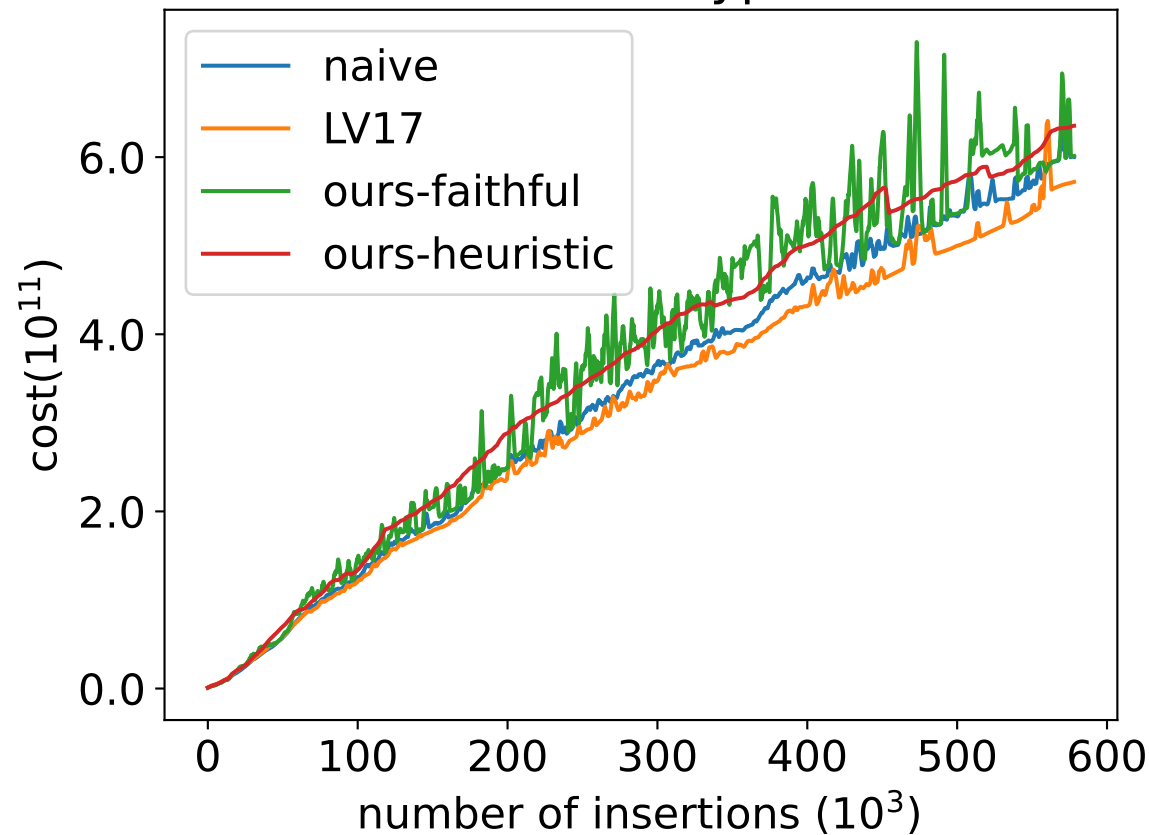

Supplement: supplementary_material [file attachment]

consistency for SKIN, k=5

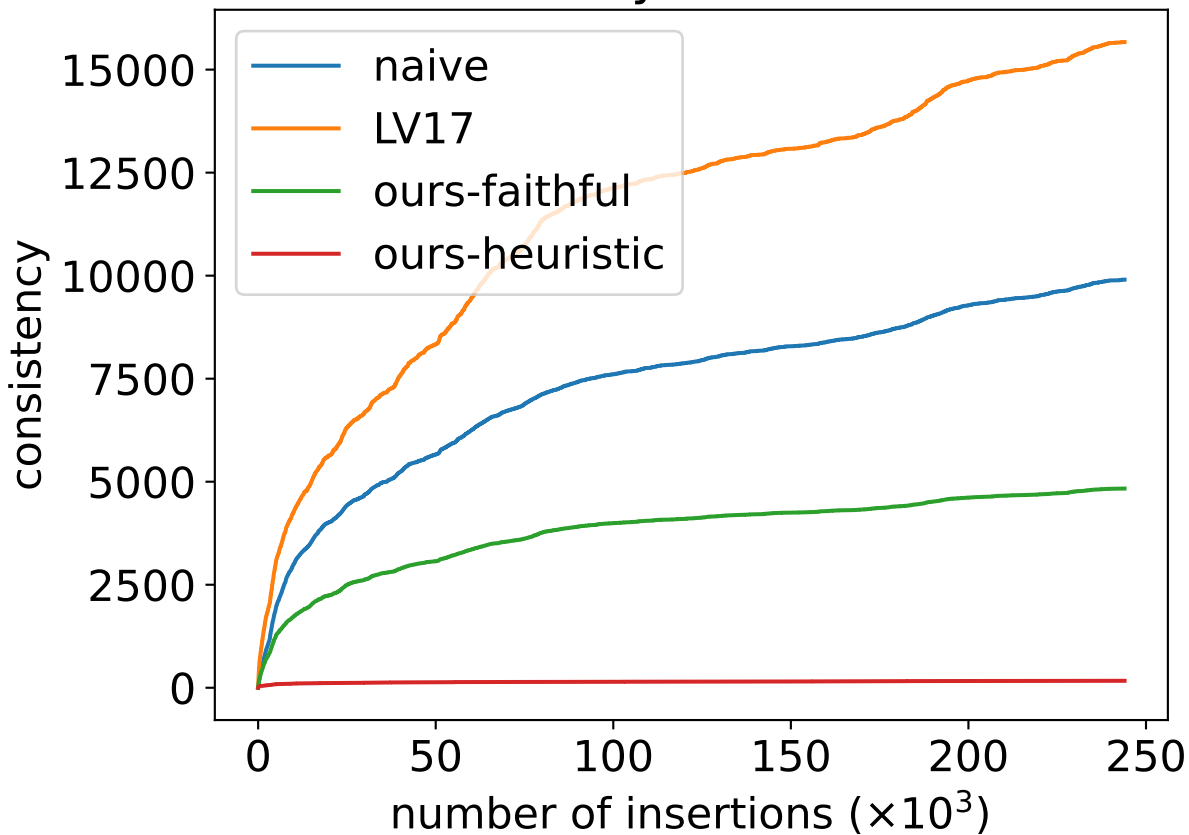

Supplement: supplementary_material [file attachment]

cumulative running time for SKIN, k=10

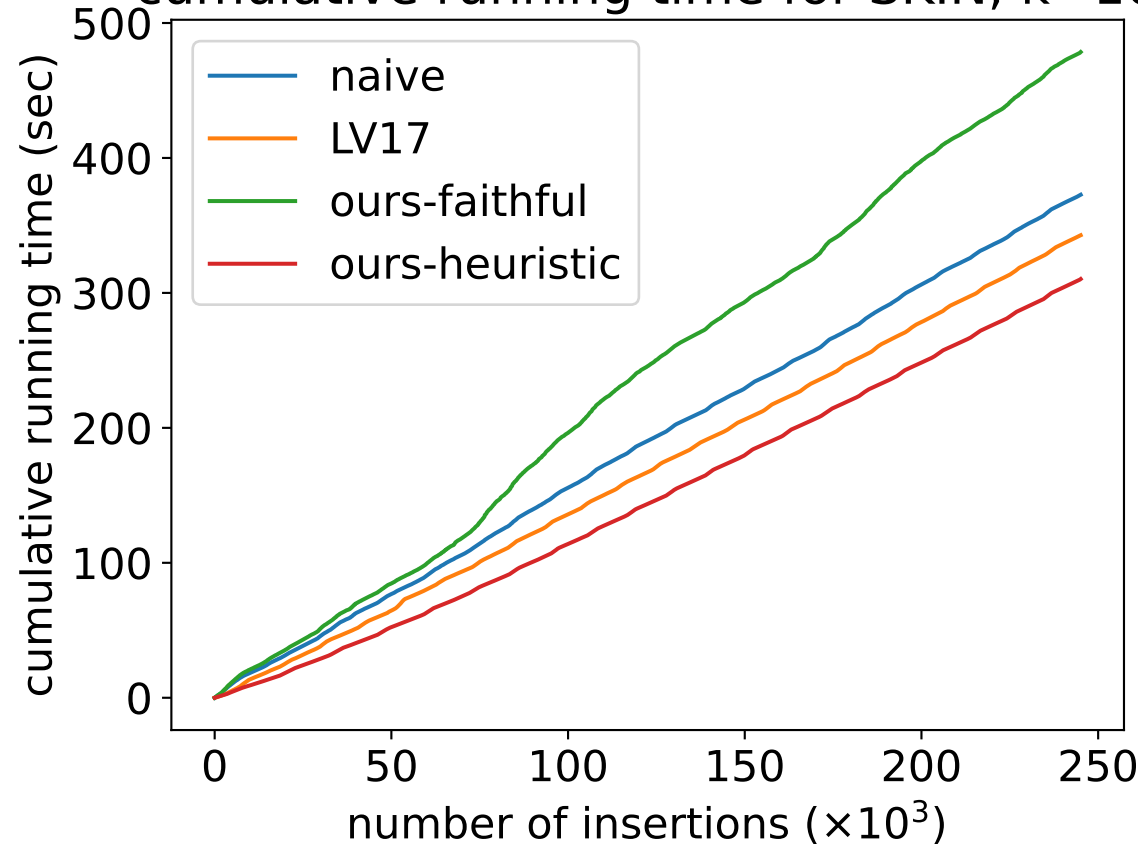

Supplement: supplementary_material [file attachment]

cumulative running time for COVERTYPE, k=10

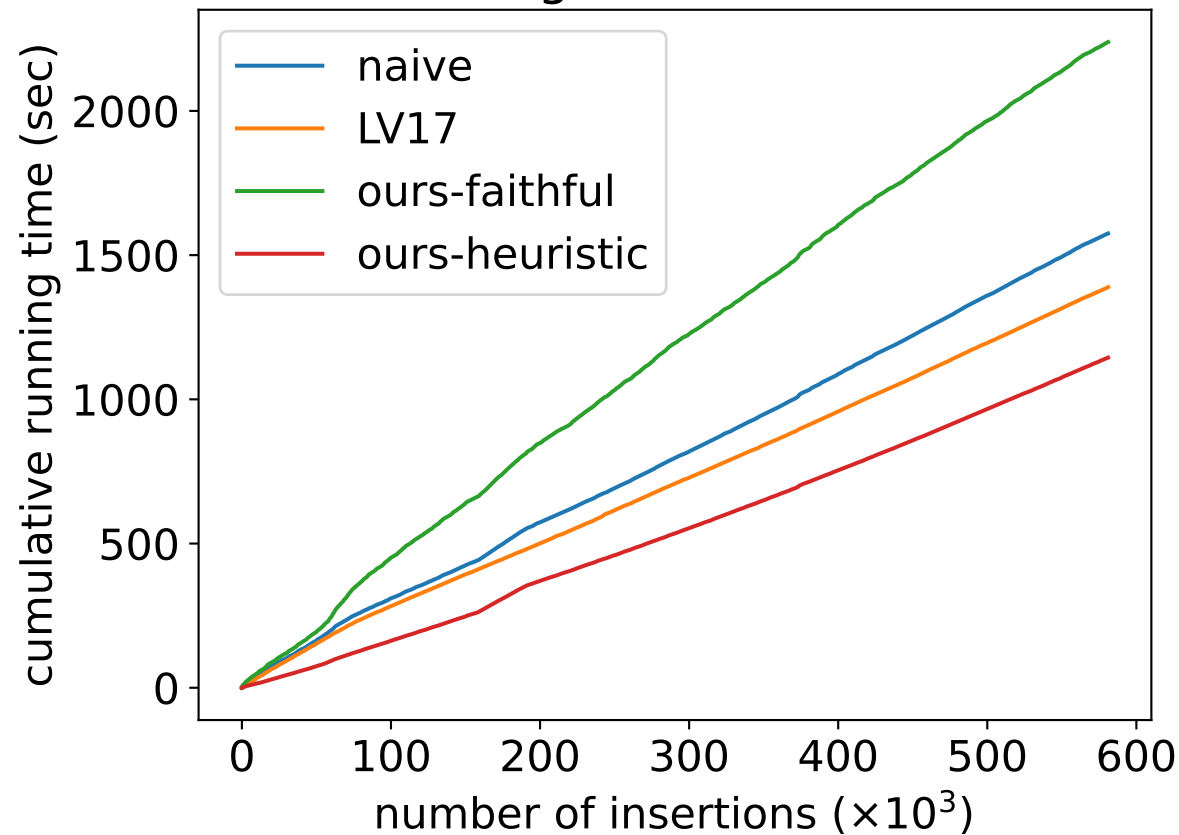

Supplement: supplementary_material [file attachment]

consistency for SKIN, k=20

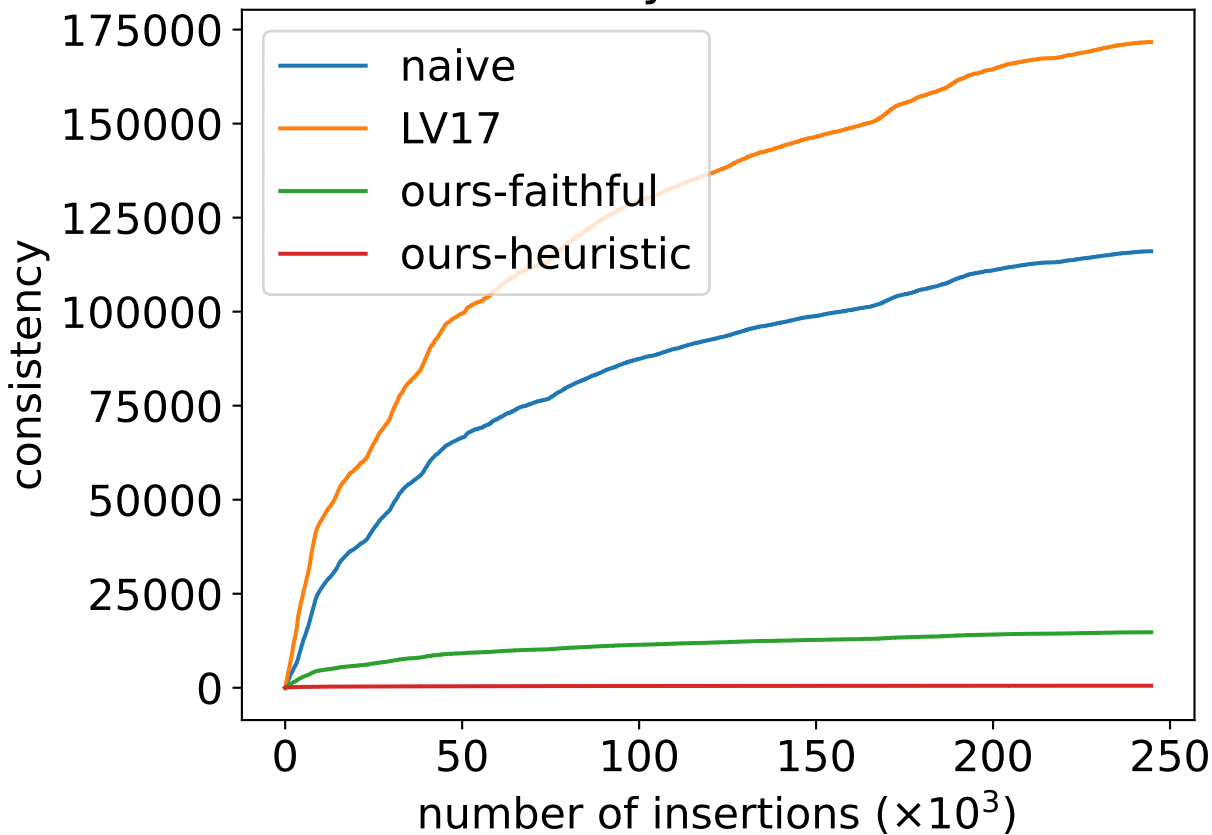

Supplement: supplementary_material [file attachment]

consistency for COVERTYPE, k=5

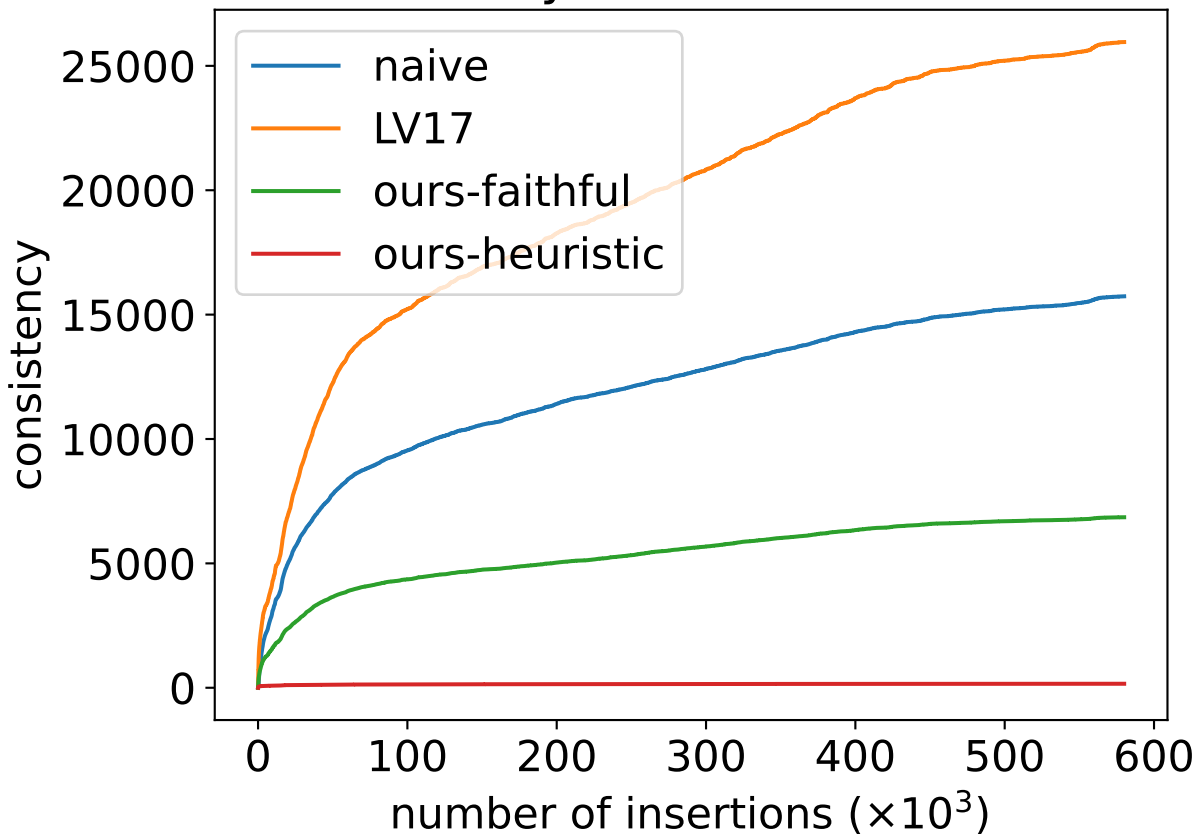

Supplement: supplementary_material [file attachment]

cost for skin, k=10

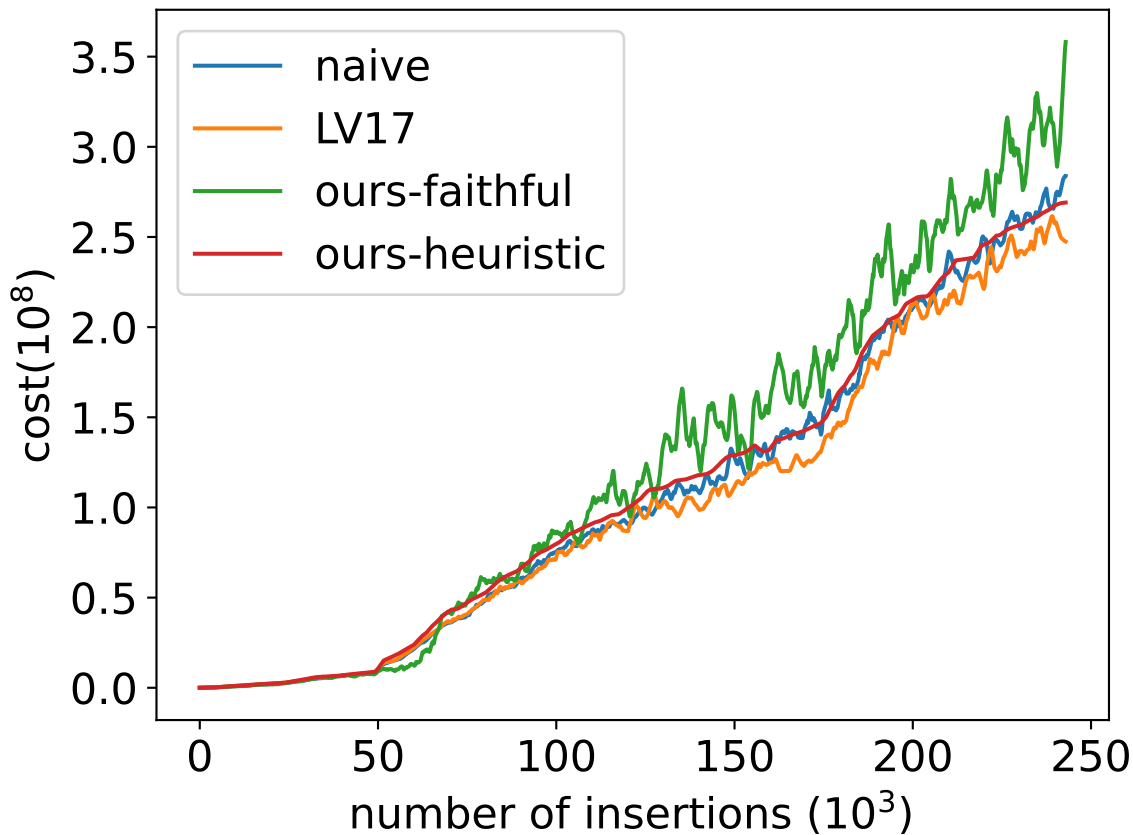

Supplement: supplementary_material [file attachment]

cost for shuttle, k=20

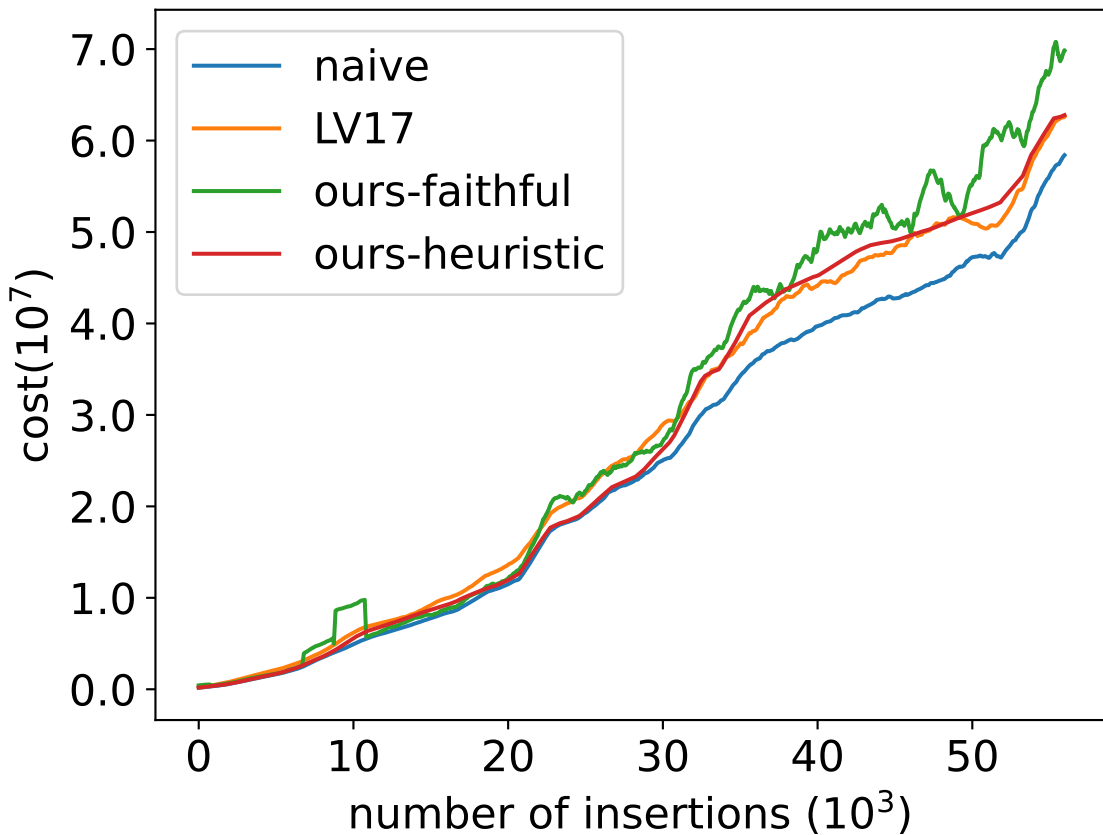

Supplement: supplementary_material [file attachment]

cumulative running time for SHUTTLE,  $k=5$

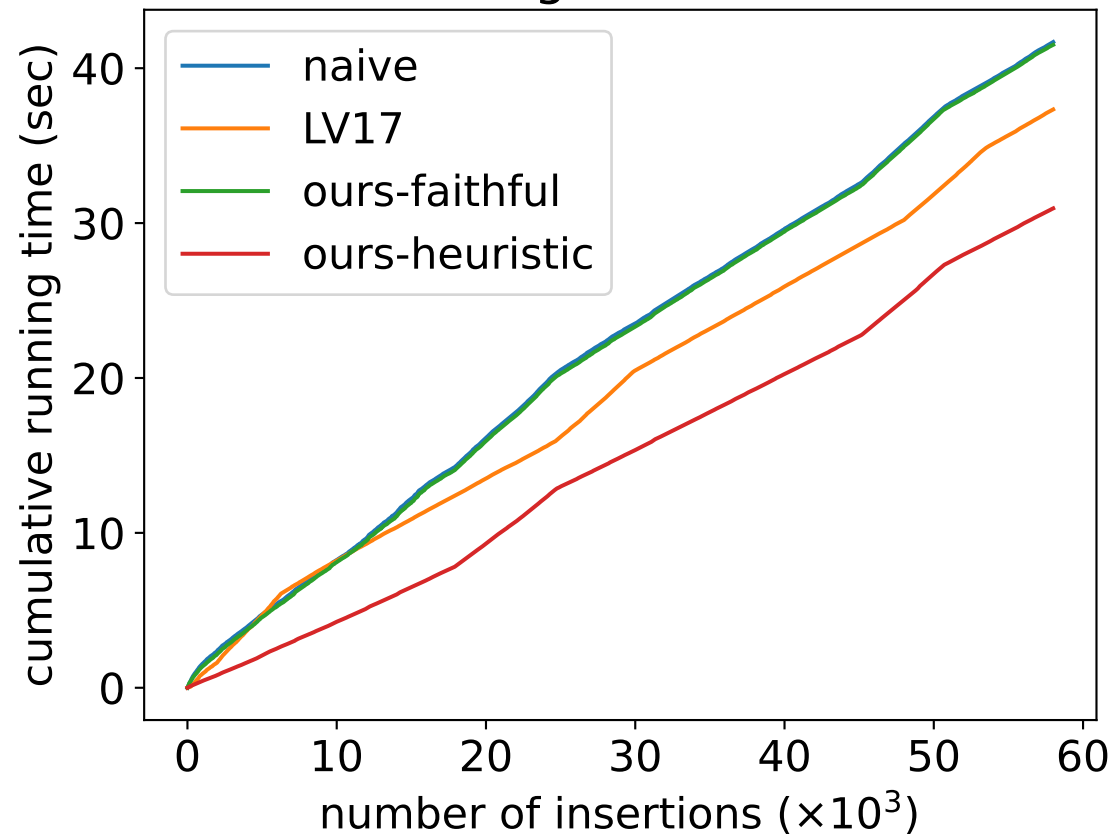

Supplement: supplementary_material [file attachment]
